# Supplementary material for: Exploring Caloric Restriction in Inpatients with Eating Disorders: Cross-Sectional and Longitudinal Associations with Body Dissatisfaction, Body Avoidance, Clinical Factors, and Psychopathology
Source: MDPI journal article supplement (doi:10.3390/nu15153409), 2023-07-31

# Exploring Caloric Restriction in Inpatients with Eating Disorders: Cross-Sectional and Longitudinal Associations with Body Dissatisfaction, Body Avoidance, Clinical Factors, and Psychopathology

## Supplementary Material

Supplementary Figure S1. Model component selection for BSQ

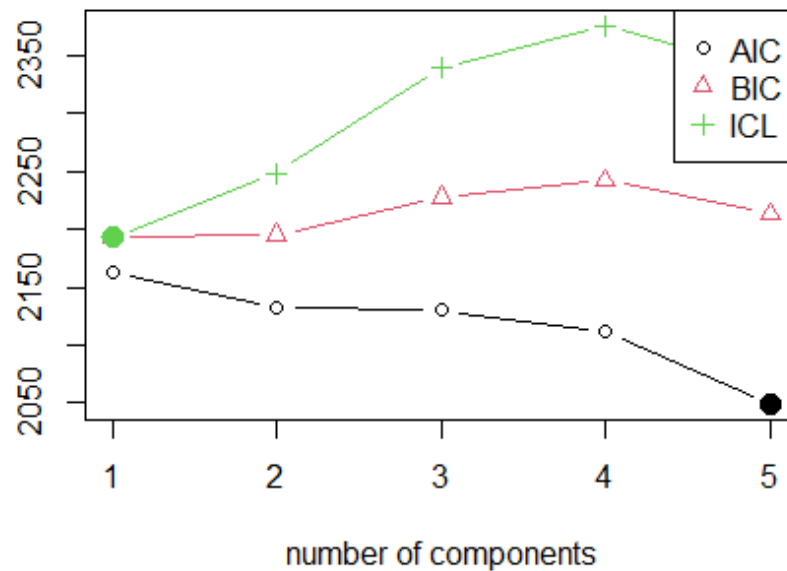

Supplementary Figure S2. Correlations in the whole sample with Holm correction for p-values

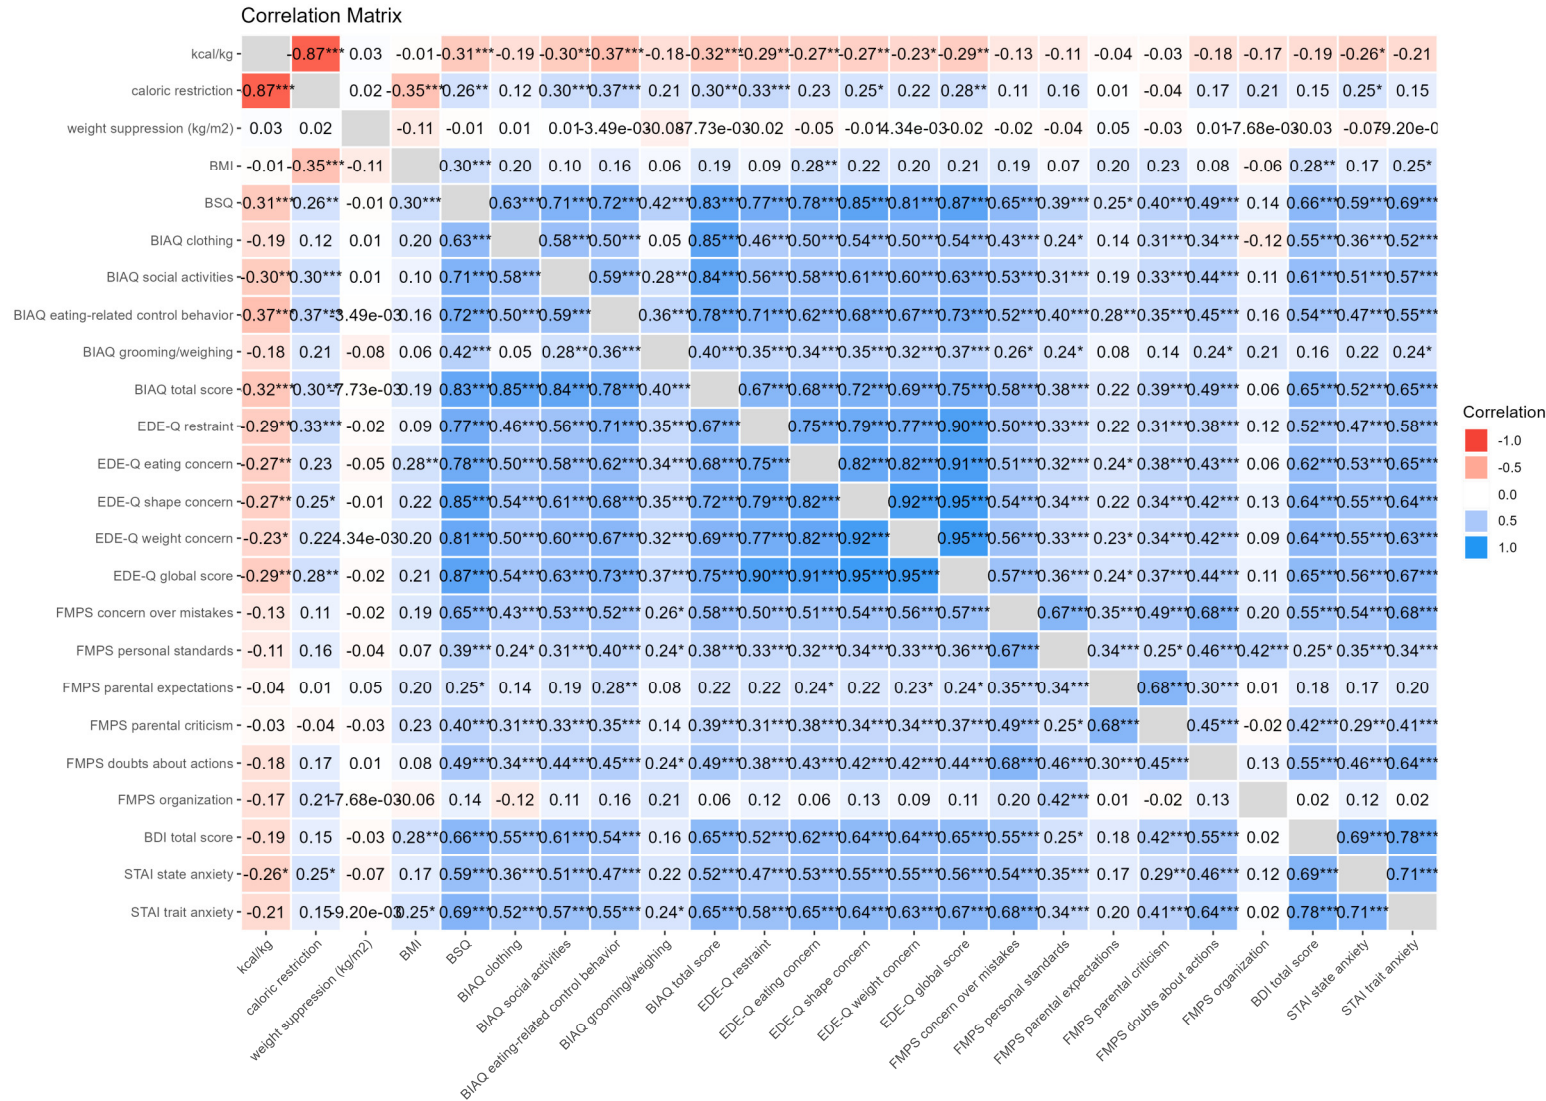

**Supplementary Figure S3.** Model check for BSQ ~caloric restriction\*weight suppression (kg/m2)+BMI+binge-purging symptoms+age (yrs)+duration of illness (yrs)

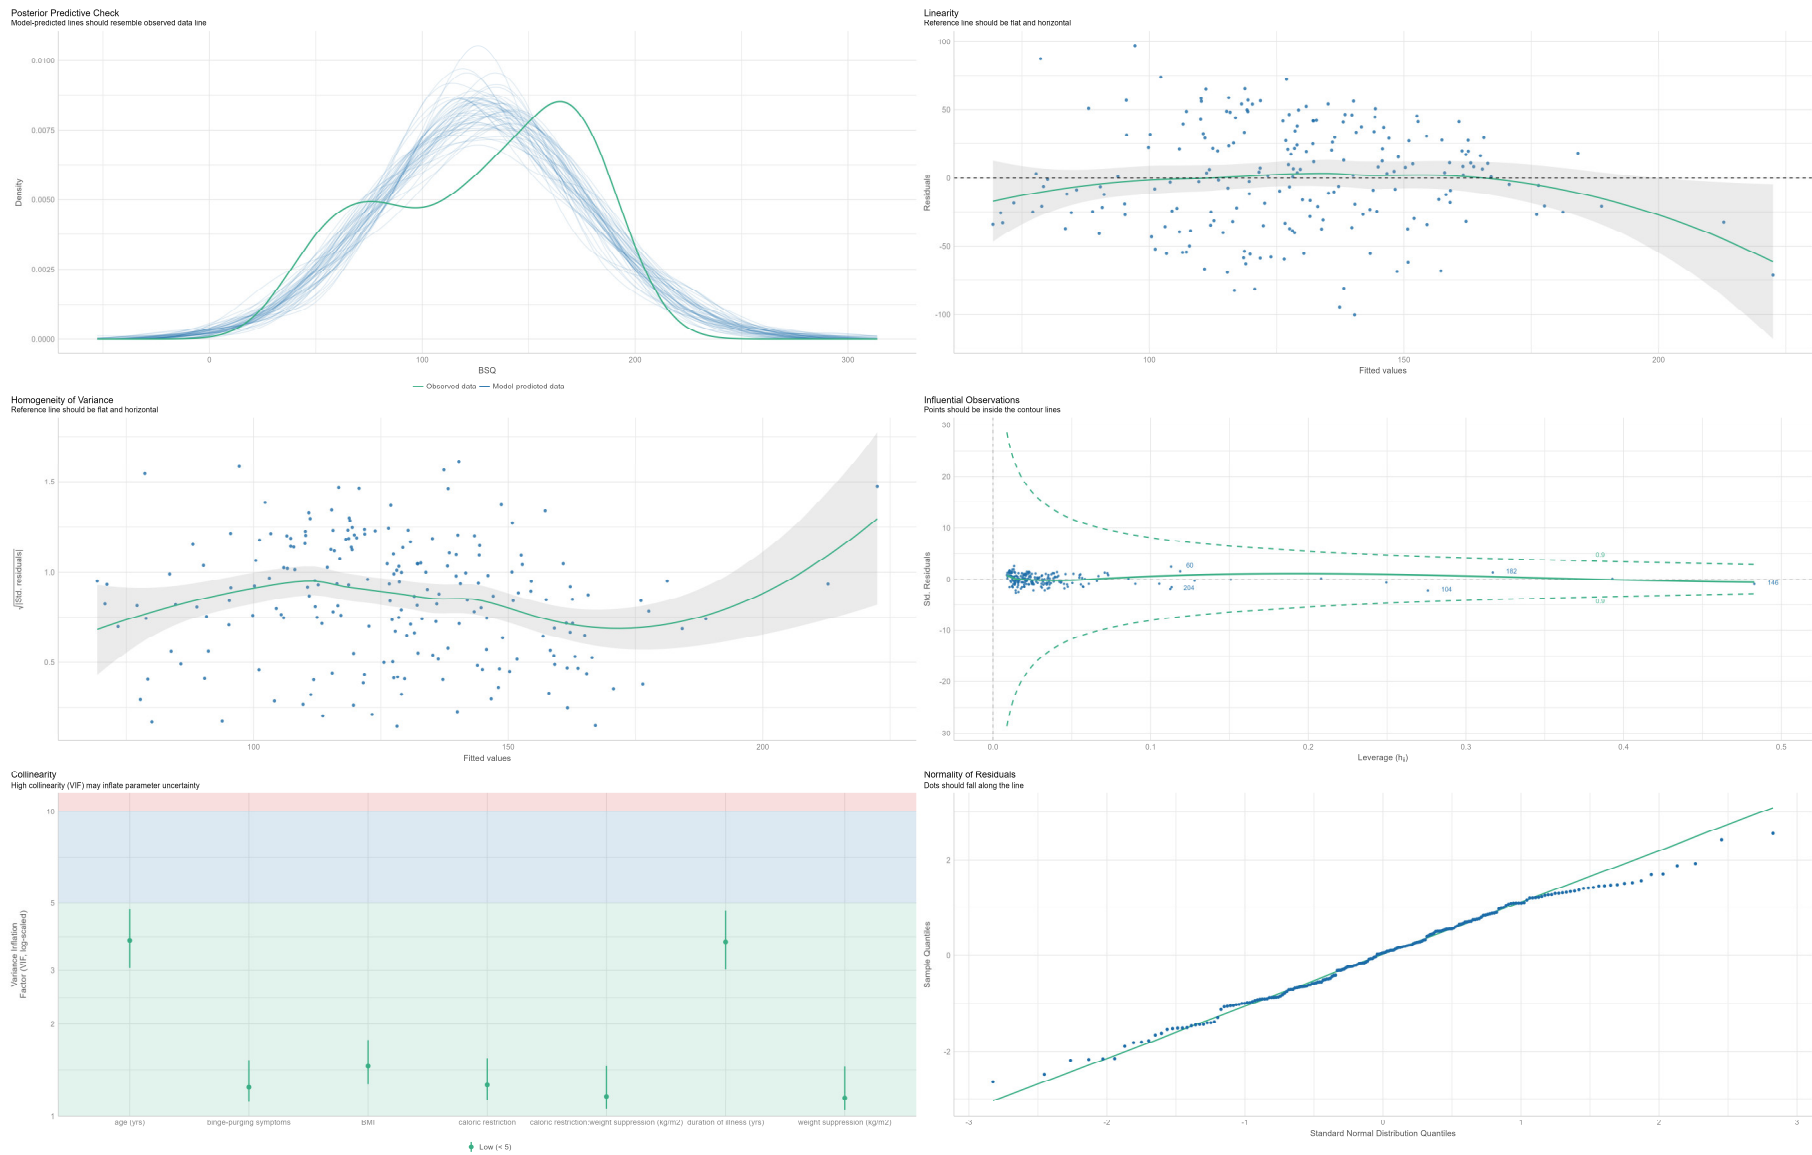

**Supplementary Figure S4.** Model check for BIAQ total ~caloric restriction\*weight suppression (kg/m2)+BMI+binge-purging symptoms+age (yrs)+duration of illness (yrs)

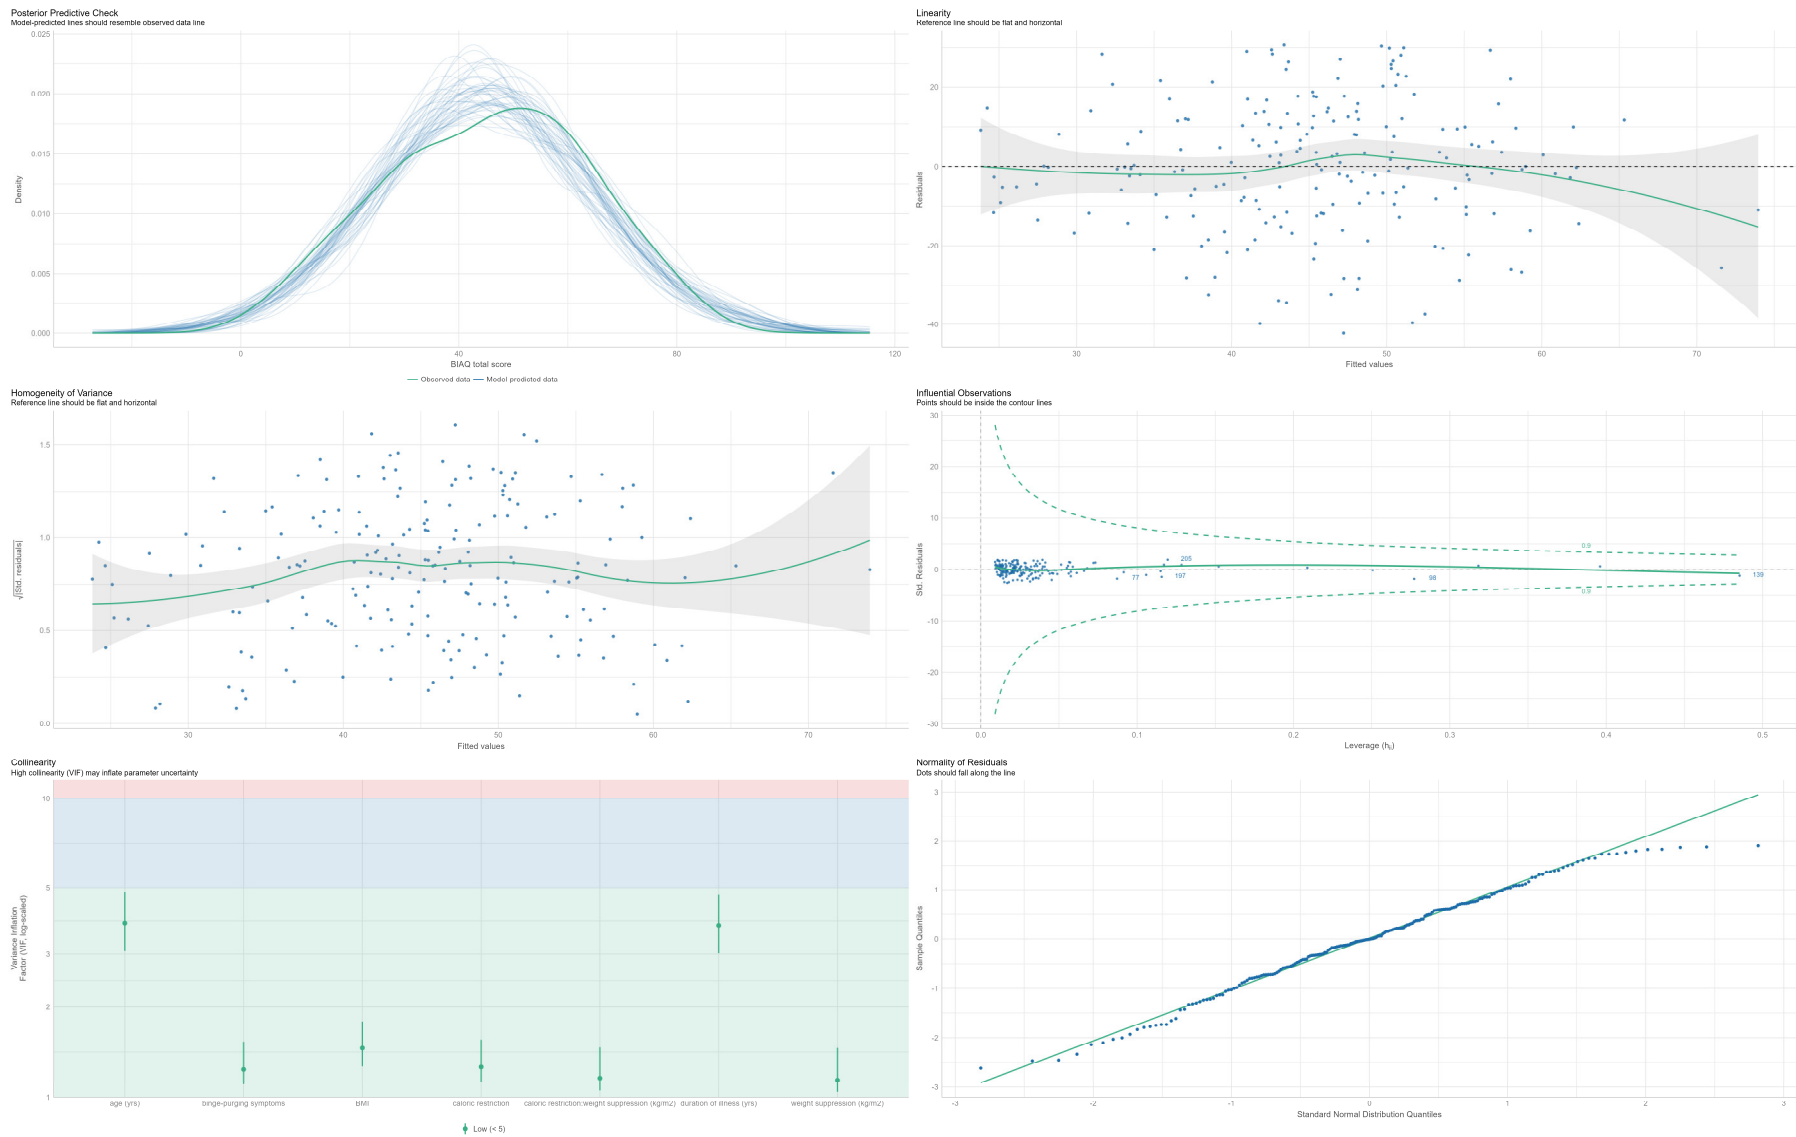

**Supplementary Table S1.** Variable importance from random forests for caloric intake at discharge

|                                      | Variable importance (root MSE of predicted versus permuted) |
|--------------------------------------|-------------------------------------------------------------|
| BMR                                  | 2.544                                                       |
| length of stay (days)                | 2.107                                                       |
| BMI                                  | 1.907                                                       |
| daily calorie need                   | 1.639                                                       |
| FMPS concern over mistakes           | 1.523                                                       |
| kcal/kg                              | 1.387                                                       |
| caloric restriction                  | 1.106                                                       |
| BMI EOT                              | 1.072                                                       |
| STAI state anxiety                   | 0.957                                                       |
| EDE-Q eating concern                 | 0.847                                                       |
| EDE-Q global score                   | 0.844                                                       |
| BDI total score                      | 0.755                                                       |
| BSQ                                  | 0.736                                                       |
| EDE-Q weight concern                 | 0.691                                                       |
| BIAQ eating-related control behavior | 0.606                                                       |
| EDE-Q shape concern                  | 0.585                                                       |
| enteral therapy                      | 0.576                                                       |
| weight suppression                   | 0.464                                                       |
| binge-purging symptoms               | 0.457                                                       |
| BIAQ social activities               | 0.438                                                       |
| STAI trait anxiety                   | 0.353                                                       |
| BIAQ total score                     | 0.344                                                       |
| duration of illness (yrs)            | 0.333                                                       |
| FMPS parental criticism              | 0.266                                                       |
| EDE-Q restraint                      | 0.225                                                       |
| FMPS parental expectations           | 0.200                                                       |
| history of overweight/obesity        | 0.136                                                       |

|                           | Variable importance (root MSE of predicted versus permuted) |
|---------------------------|-------------------------------------------------------------|
| BIAQ grooming/weighing    | 0.117                                                       |
| sex                       | 0.000                                                       |
| FMPS personal standards   | 0.000                                                       |
| age (yrs)                 | 0.000                                                       |
| FMPS organization         | 0.000                                                       |
| FMPS doubts about actions | 0.000                                                       |
| activity                  | 0.000                                                       |
| BIAQ clothing             | 0.000                                                       |
| diagnosis                 | 0.000                                                       |

**Supplementary Table S2.** Variable importance from random forests for caloric restriction at discharge

|                                      | Variable importance (root MSE of predicted versus permuted) |
|--------------------------------------|-------------------------------------------------------------|
| daily calorie need                   | 6.539                                                       |
| FMPS concern over mistakes           | 5.036                                                       |
| STAI state anxiety                   | 4.651                                                       |
| BMR                                  | 4.280                                                       |
| EDE-Q global score                   | 4.092                                                       |
| BSQ                                  | 3.844                                                       |
| age (yrs)                            | 3.634                                                       |
| activity                             | 3.245                                                       |
| length of stay (days)                | 3.200                                                       |
| EDE-Q weight concern                 | 3.061                                                       |
| EDE-Q eating concern                 | 2.773                                                       |
| EDE-Q shape concern                  | 2.725                                                       |
| FMPS personal standards              | 2.449                                                       |
| caloric restriction                  | 2.186                                                       |
| duration of illness (yrs)            | 2.072                                                       |
| STAI trait anxiety                   | 1.903                                                       |
| EDE-Q restraint                      | 1.897                                                       |
| BMI EOT                              | 1.812                                                       |
| BDI total score                      | 1.600                                                       |
| BIAQ eating-related control behavior | 1.578                                                       |
| BIAQ grooming/weighing               | 1.437                                                       |
| enteral therapy                      | 1.044                                                       |
| BIAQ total score                     | 0.881                                                       |
| BIAQ social activities               | 0.715                                                       |
| FMPS parental expectations           | 0.504                                                       |
| binge-purging symptoms               | 0.384                                                       |
| FMPS doubts about actions            | 0.373                                                       |

|                               | Variable importance (root MSE of predicted versus permuted) |
|-------------------------------|-------------------------------------------------------------|
| FMPS organization             | 0.317                                                       |
| sex                           | 0.200                                                       |
| kcal/kg                       | 0.000                                                       |
| history of overweight/obesity | 0.000                                                       |
| weight suppression            | 0.000                                                       |
| BMI                           | 0.000                                                       |
| diagnosis                     | 0.000                                                       |
| BIAQ clothing                 | 0.000                                                       |
| FMPS parental criticism       | 0.000                                                       |



**Supplementary Figure S5.** Model check for kcal/kg EOT ~ BMR + length of stay (days) + BMI + daily calorie need + FMPS concern over mistakes

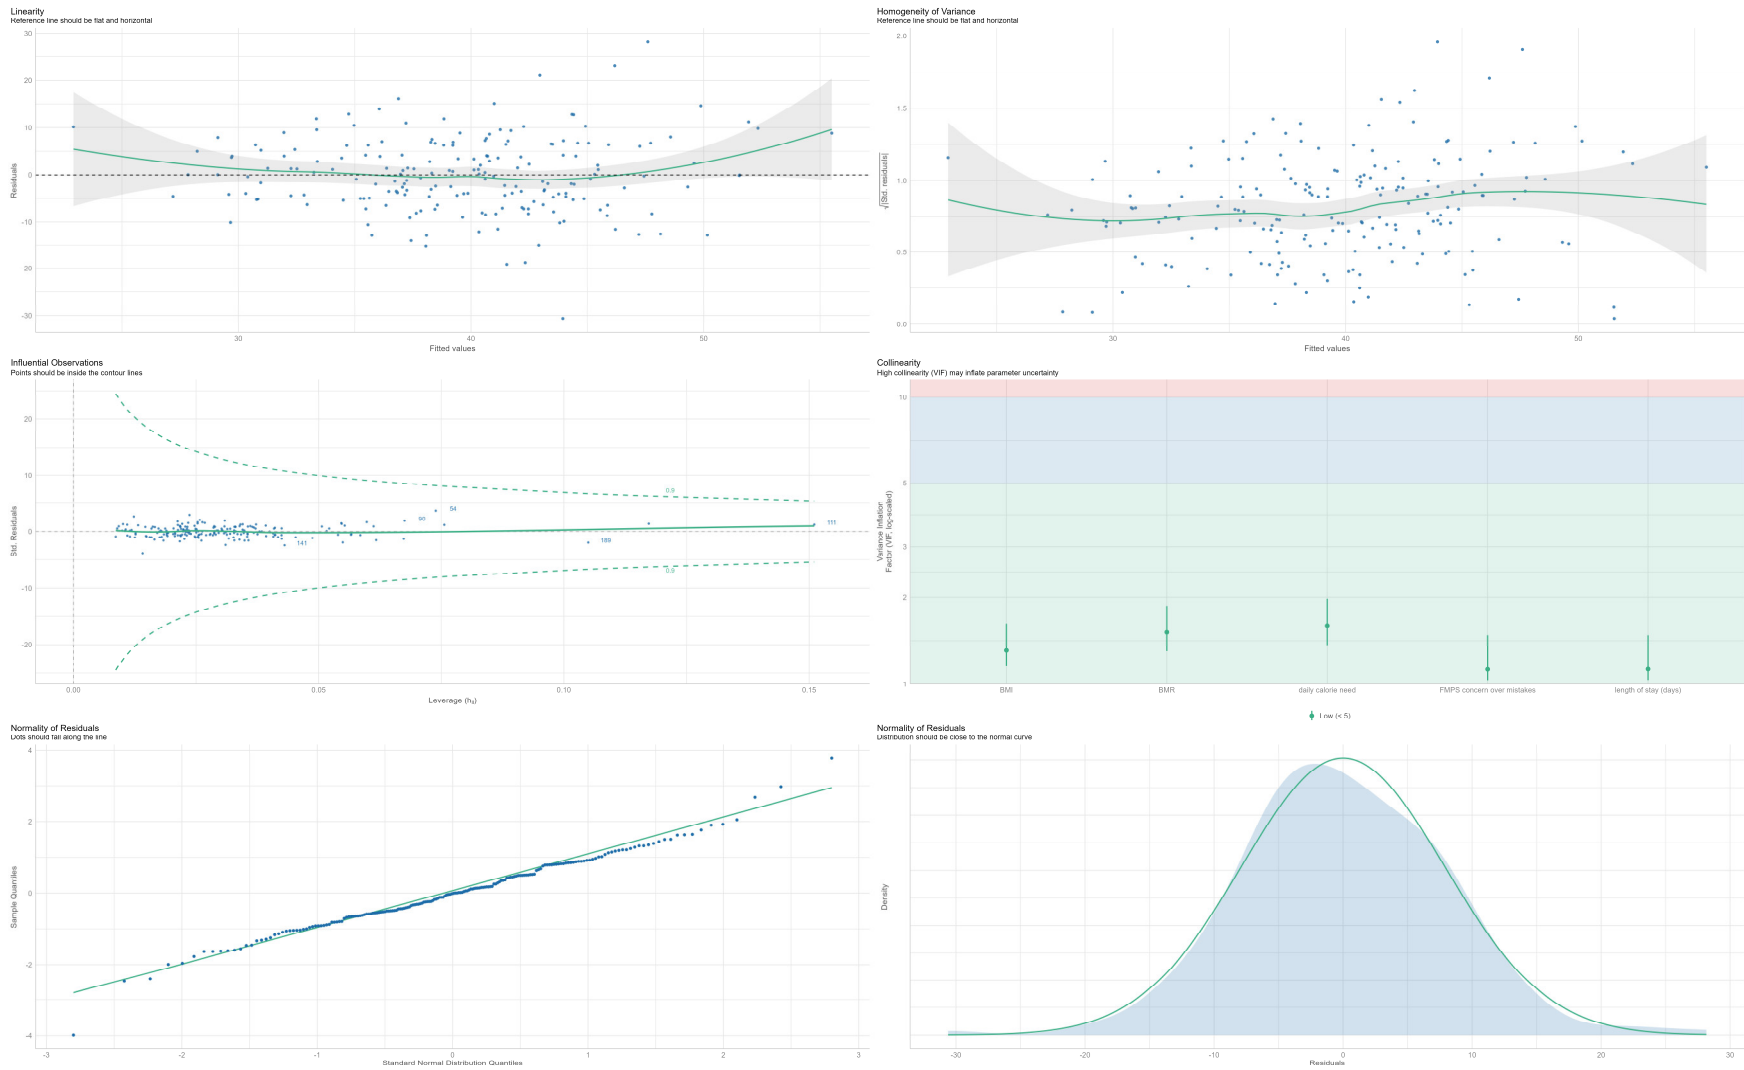

**Supplementary Figure S6.** Model check for caloric restriction EOT ~ daily calorie need + FMPS concern over mistakes + STAI state anxiety + BMR + EDE-Q global score

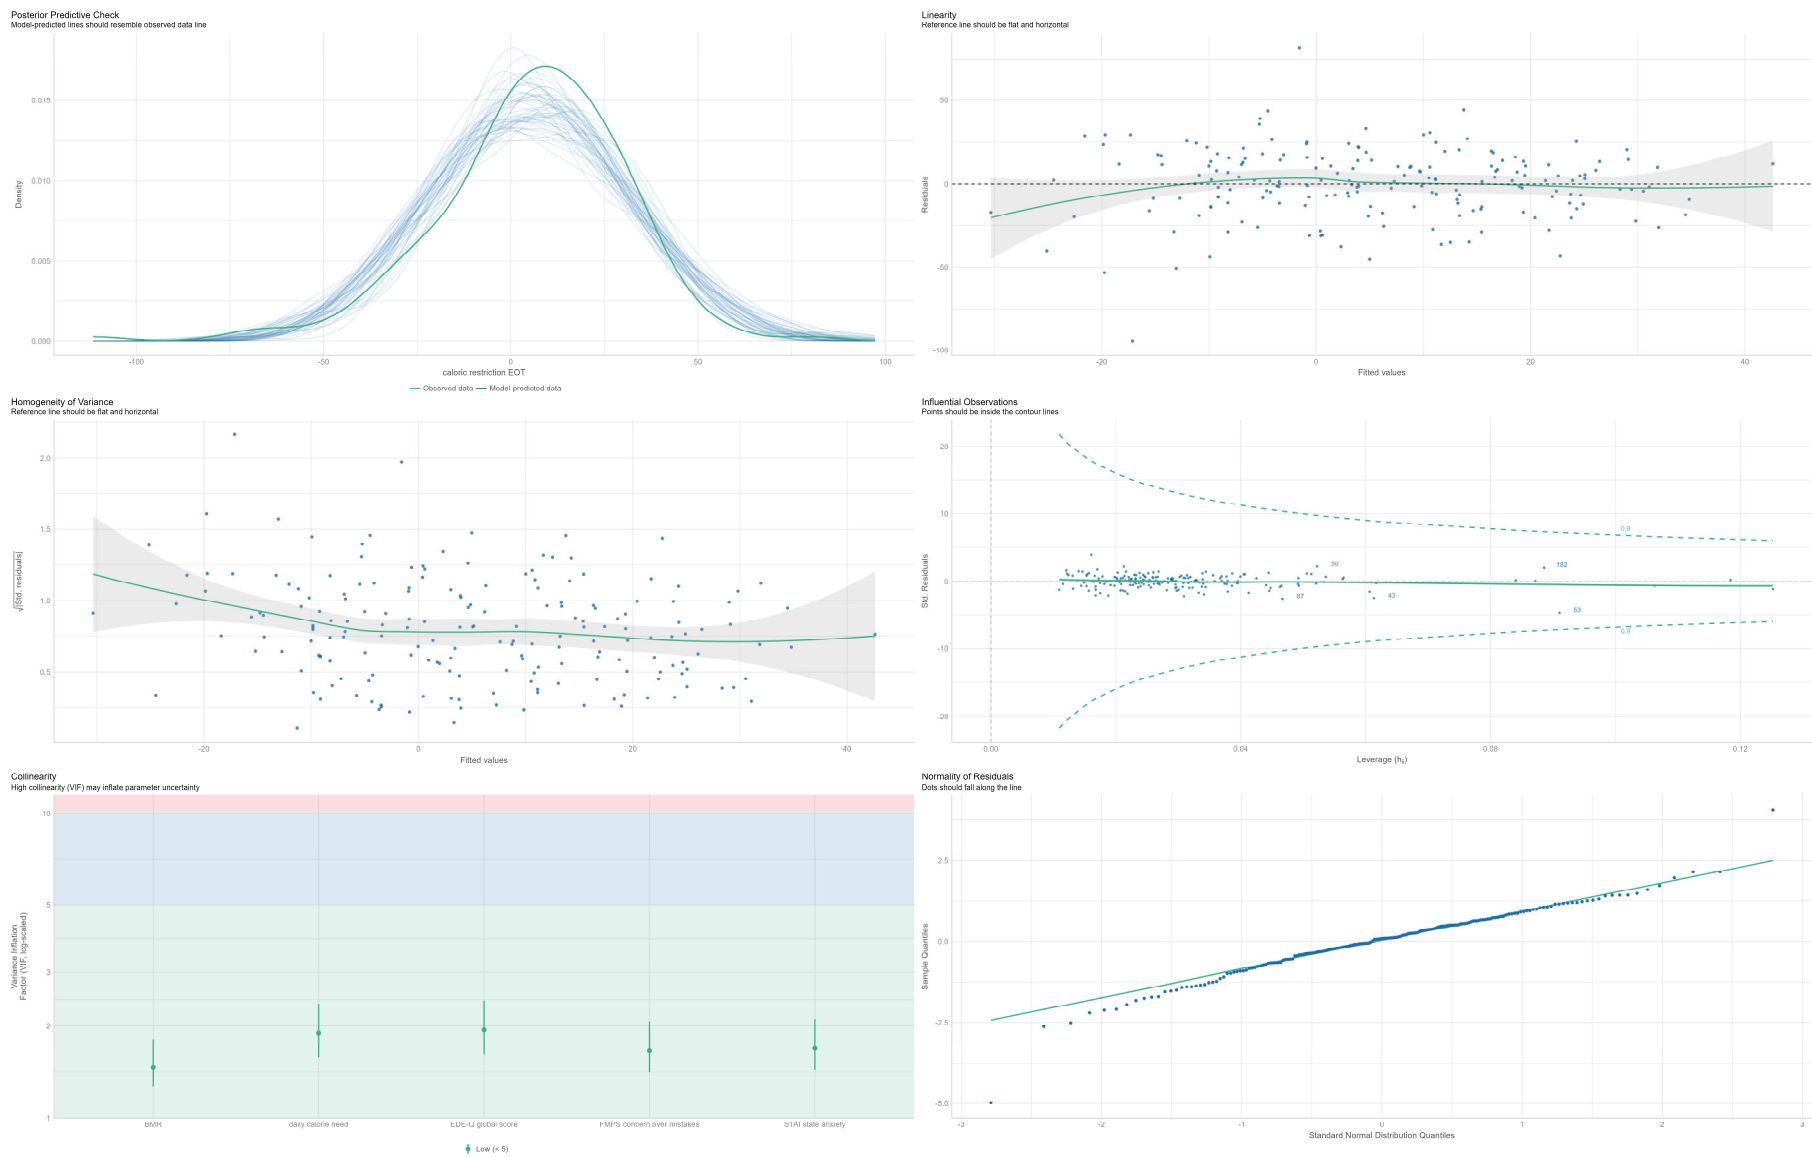

Supplement: s1 [file s1]
